# Supplementary material for: Anthracene-(aminomethyl)phenylboronic acid ester-immobilized glass substrates as fluorescent sensing materials based on photo-induced electron transfer for detection and visualization of water
Source: Royal Society of Chemistry journal article supplement (doi:10.1039/d3sd00264k), 2024-01-01
Supplement: d3sd00264k1.pdf [file d3sd00264k1.pdf]

## Supplementary Information

### **Anthracene-(aminomethyl)phenylboronic acid ester-immobilized glass substrate as fluorescent sensing materials based on photo-induced electron transfer for detection and visualization of water**

Kazuki Tao, Keiichi Imato and Yousuke Ooyama\*

*Applied Chemistry Program, Graduate School of Advanced Science and Engineering, Hiroshima University, 1-4-1 Kagamiyama, Higashi-Hiroshima 739-8527, Japan. E-mail: yooyama@hiroshima-u.ac.jp*

(a)

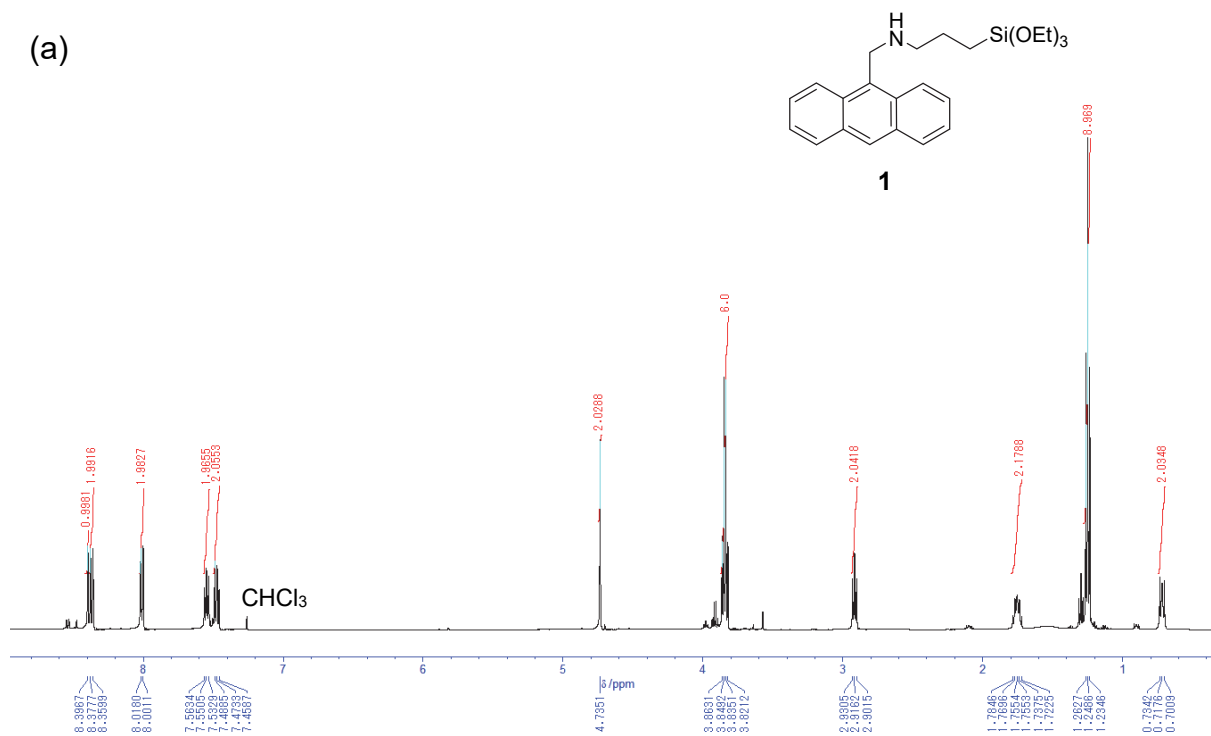

(b)

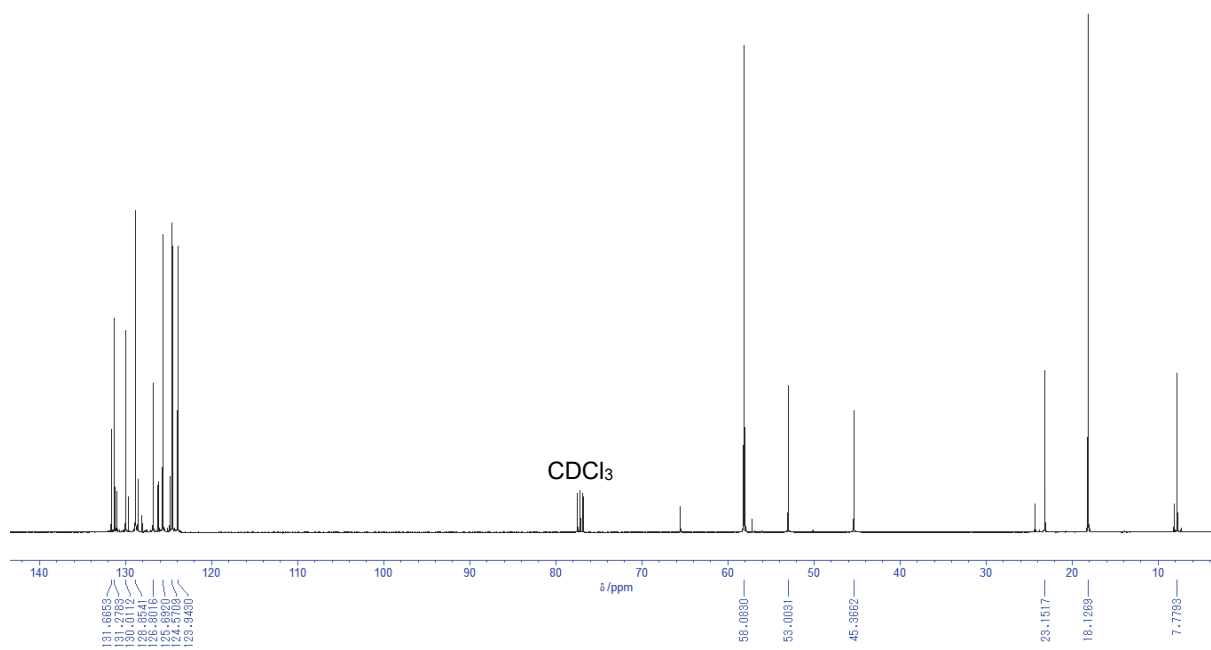

**Fig. S1** (a) <sup>1</sup>H NMR (500 MHz) and (b) <sup>13</sup>C NMR (125 MHz) spectra of **1** in CDCl<sub>3</sub>.

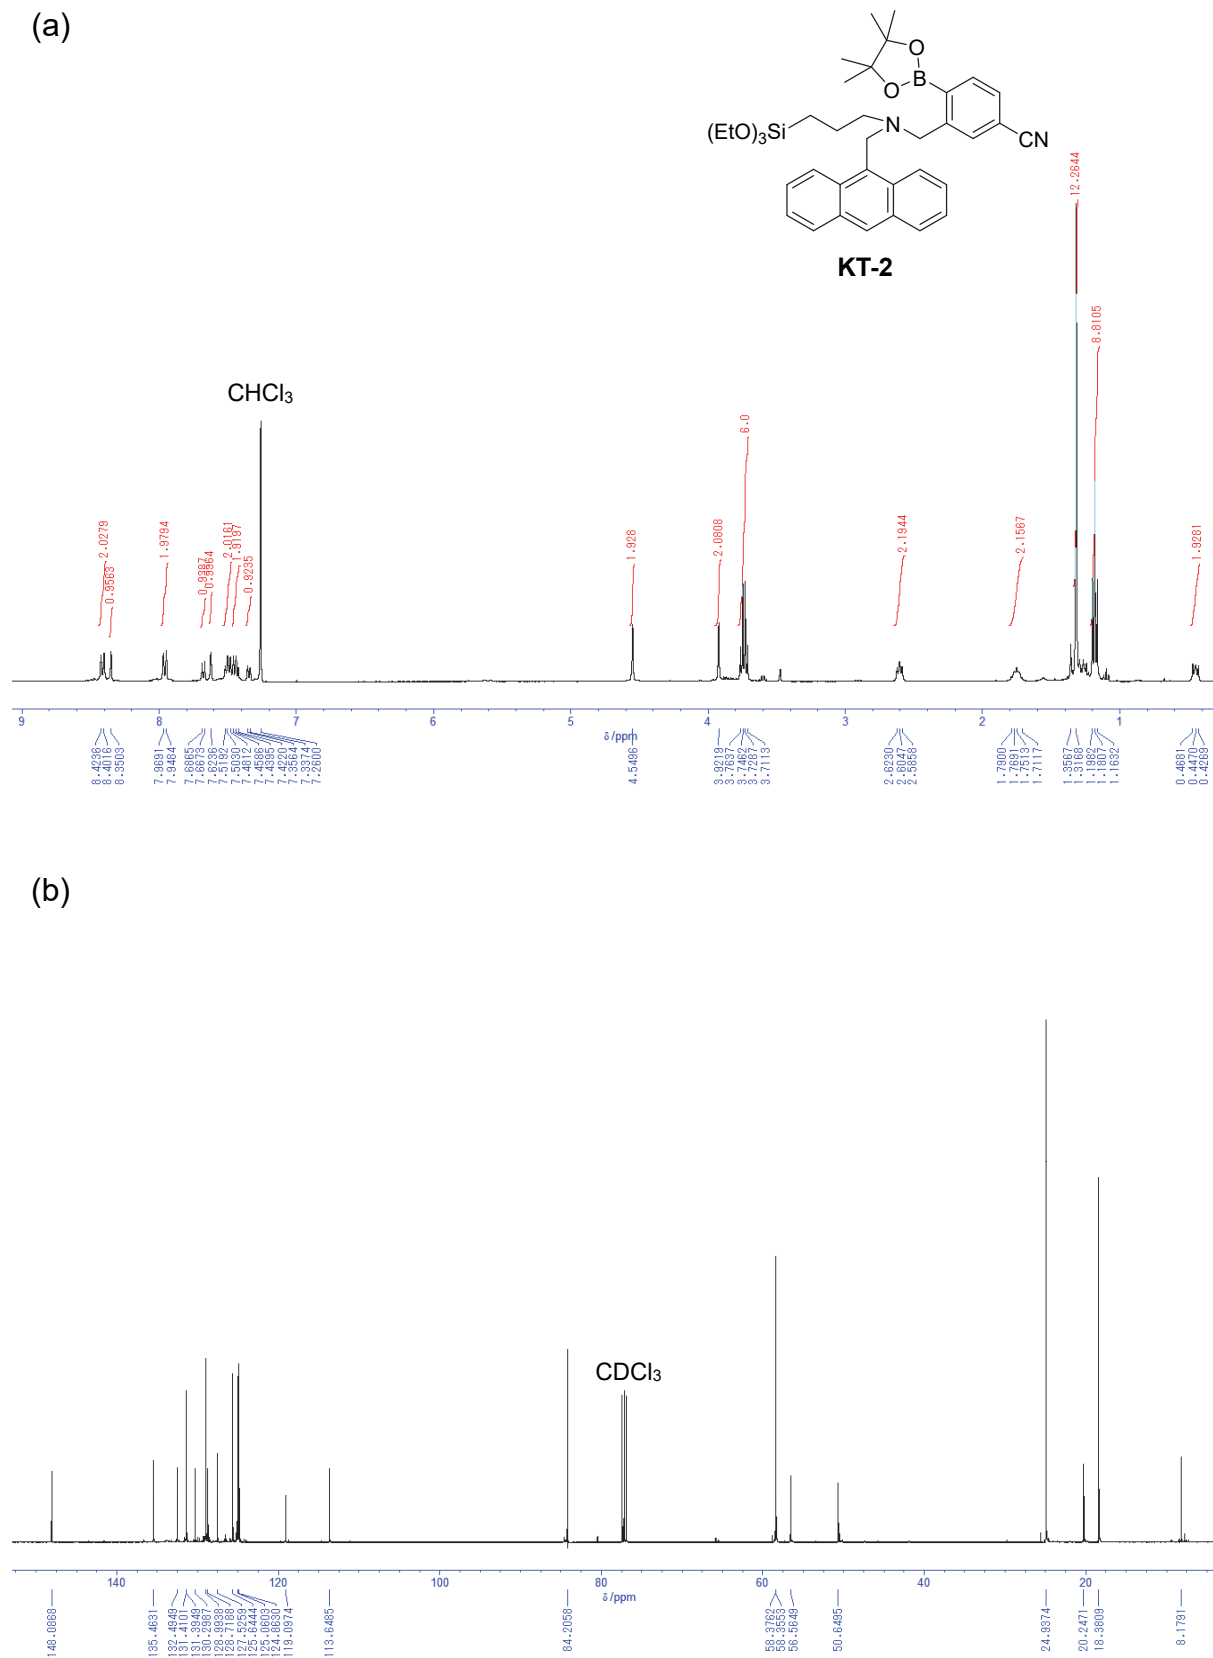

**Fig. S2** (a)  $^1\text{H}$  NMR (400 MHz) and (b)  $^{13}\text{C}$  NMR (125 MHz) spectra of **KT-2** in  $\text{CDCl}_3$ .

(a)

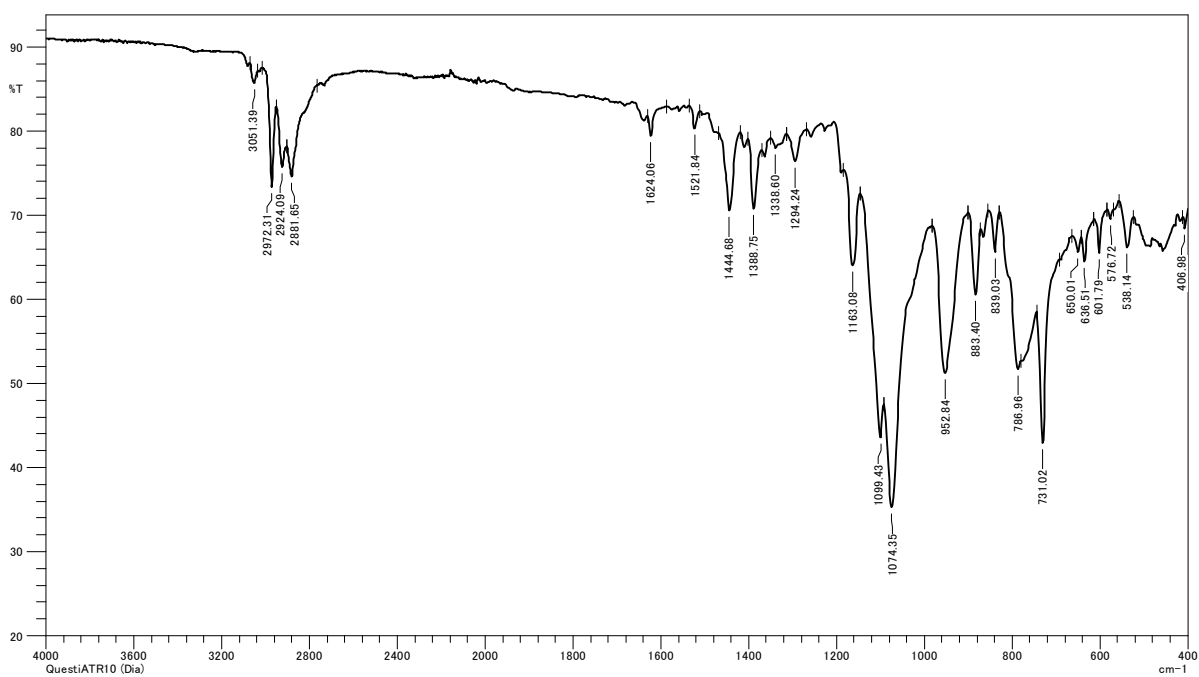

(b)

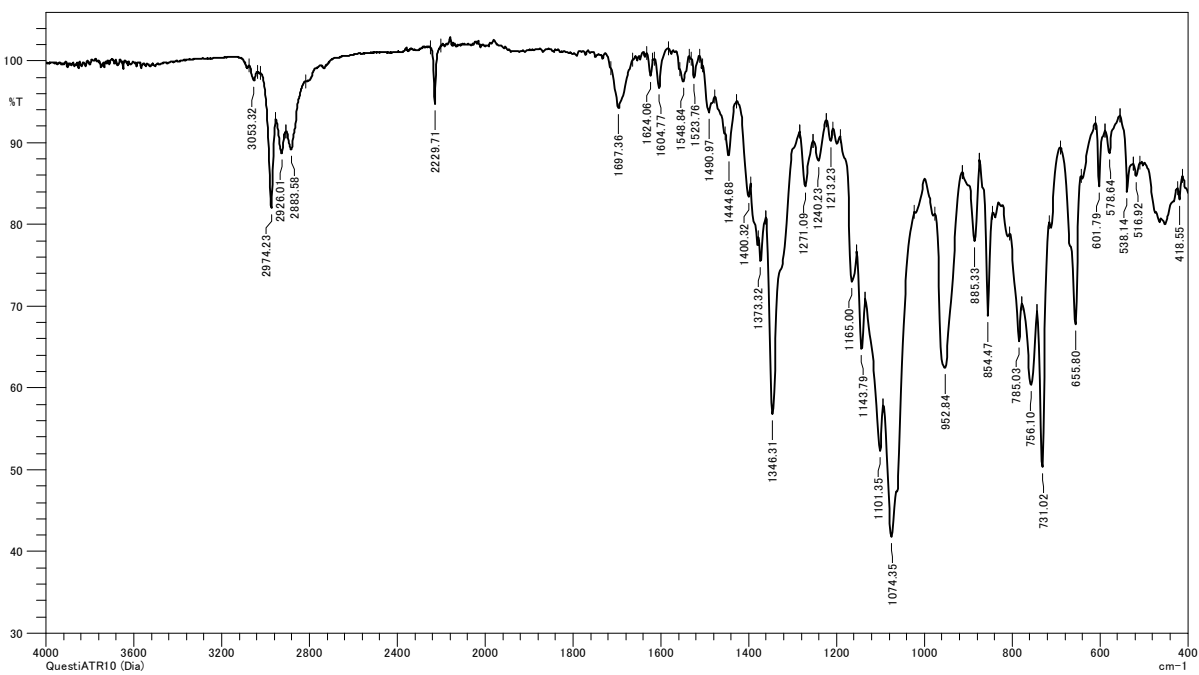

Fig. S3 FT-IR (ATR) spectra of (a) 1 and (b) KT-2.

(a)

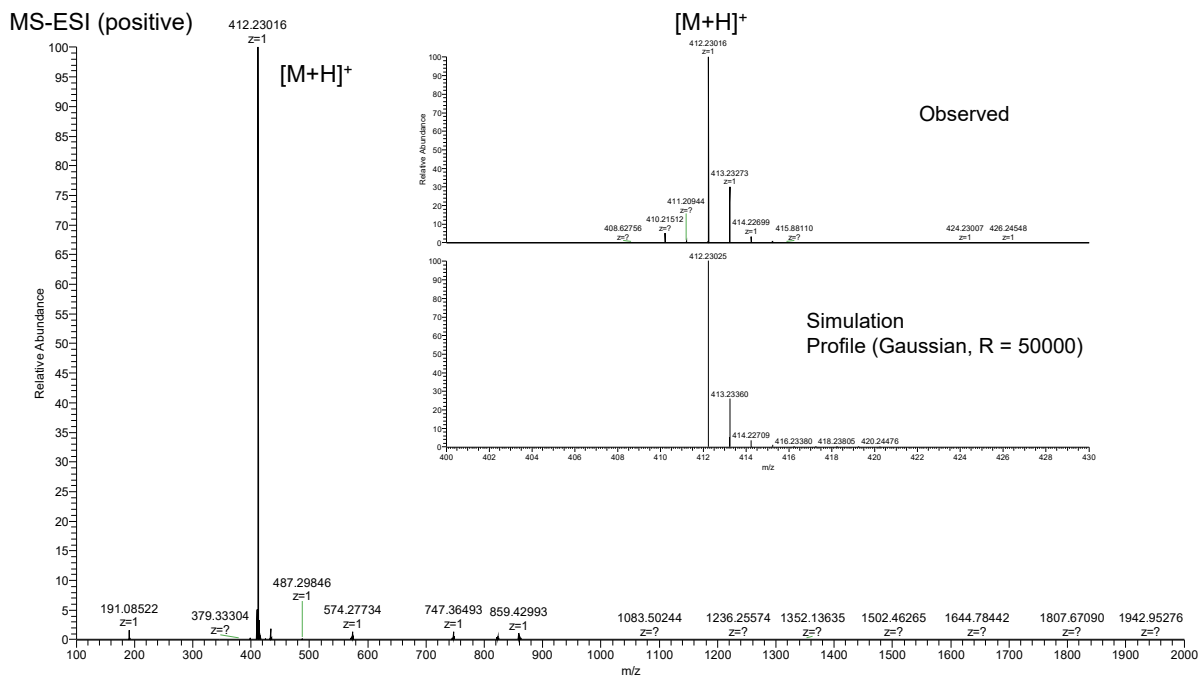

(b)

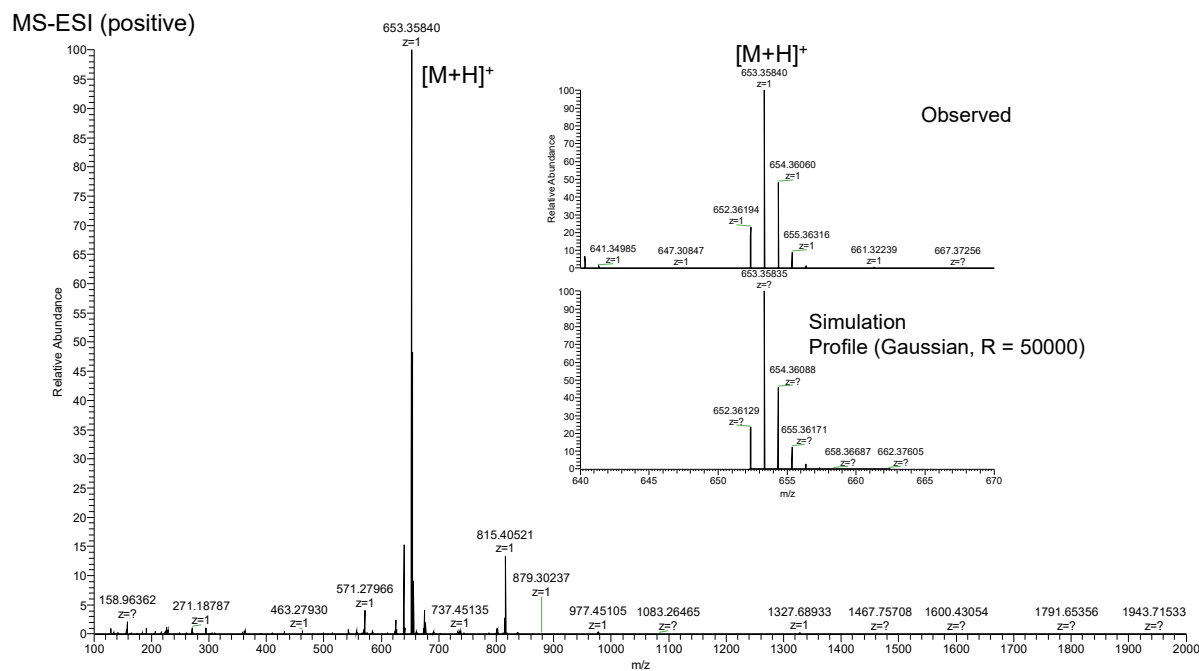

Fig. S4 HRMS spectra of (a) 1 and (b) KT-2.
